# Supplementary material for: New physiologically-relevant liver tissue model based on hierarchically cocultured primary rat hepatocytes with liver endothelial cells
Source: Royal Society of Chemistry journal article supplement (doi:10.1039/c5ib00170f), 2015-01-01
Supplement: c5ib00170f1.pdf [file c5ib00170f1.pdf]

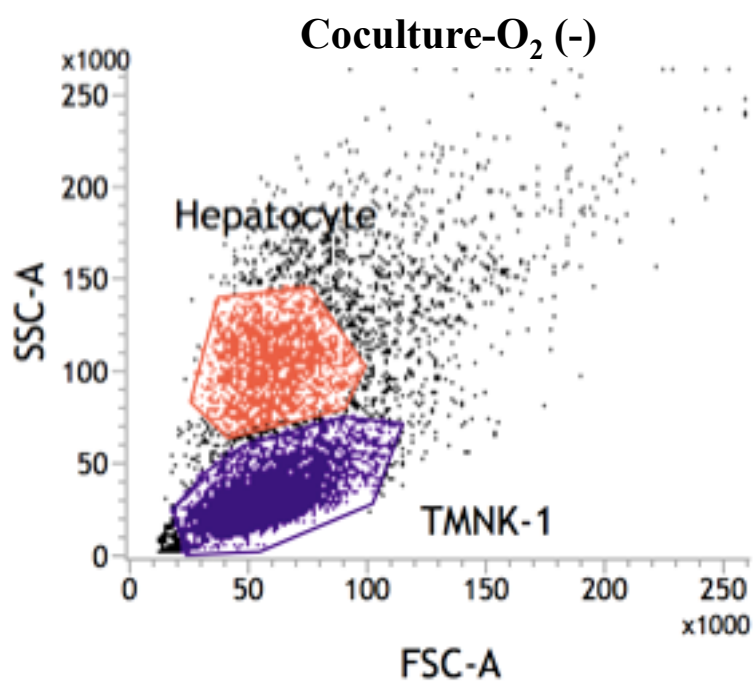

| Name       | Cells | % Parent |
|------------|-------|----------|
| Hepatocyte | 1916  | 22.1%    |
| TMNK-1     | 6747  | 77.9%    |

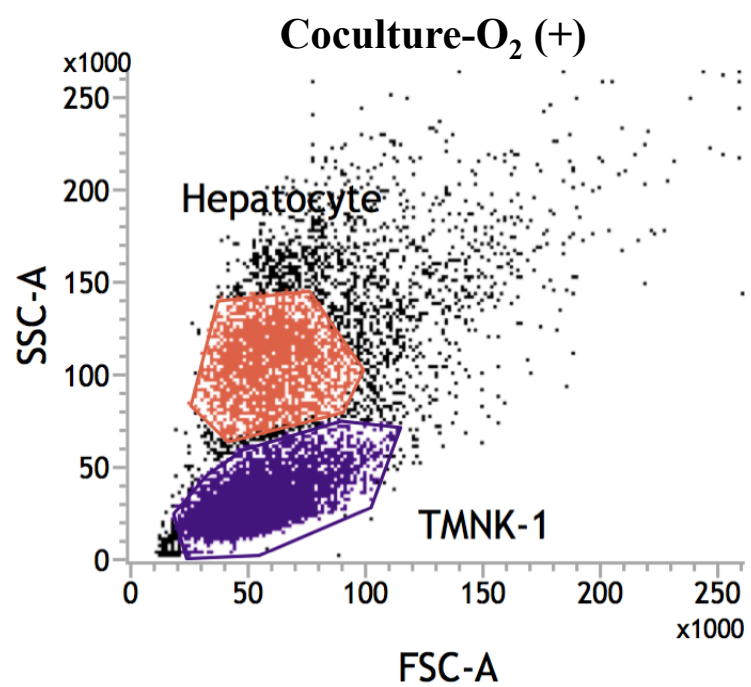

| Name       | Cells | % Parent |
|------------|-------|----------|
| Hepatocyte | 2,343 | 28.2%    |
| TMNK-1     | 5,964 | 71.8%    |

**B**

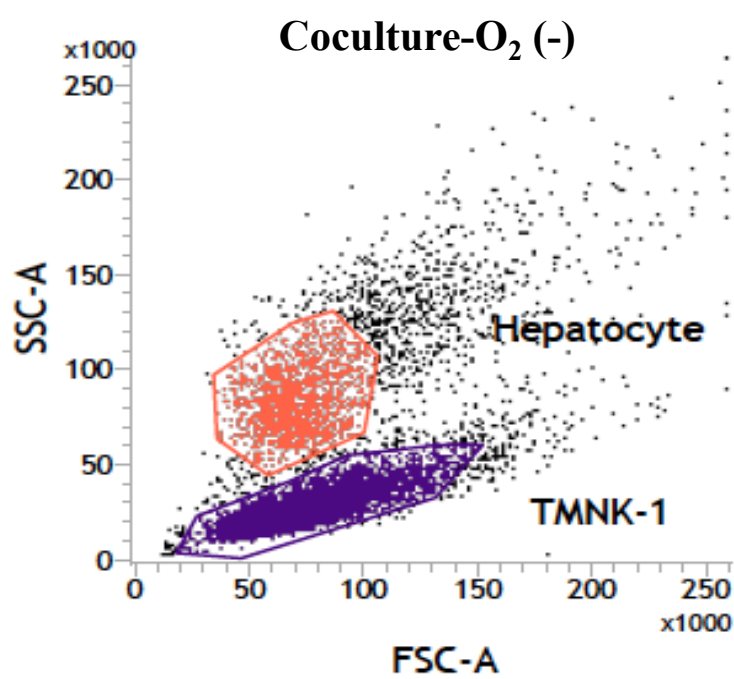

| Name       | Cells | % Parent |
|------------|-------|----------|
| Hepatocyte | 1475  | 16.7%    |
| TMNK-1     | 7336  | 83.3%    |

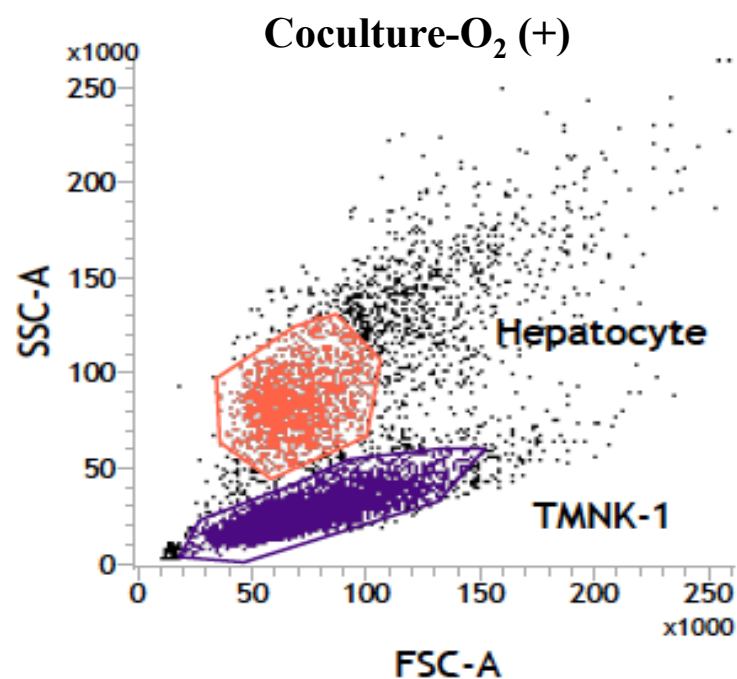

| Name       | Cells | % Parent |
|------------|-------|----------|
| Hepatocyte | 1593  | 17.8%    |
| TMNK-1     | 7344  | 82.2%    |

**C**

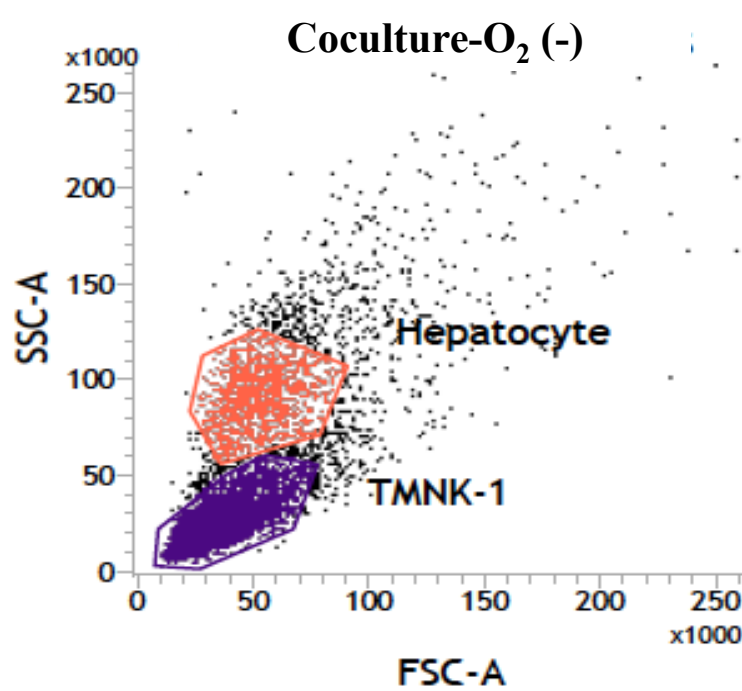

| Name       | Cells | % Parent |
|------------|-------|----------|
| Hepatocyte | 1337  | 14.9%    |
| TMNK-1     | 7646  | 85.1%    |

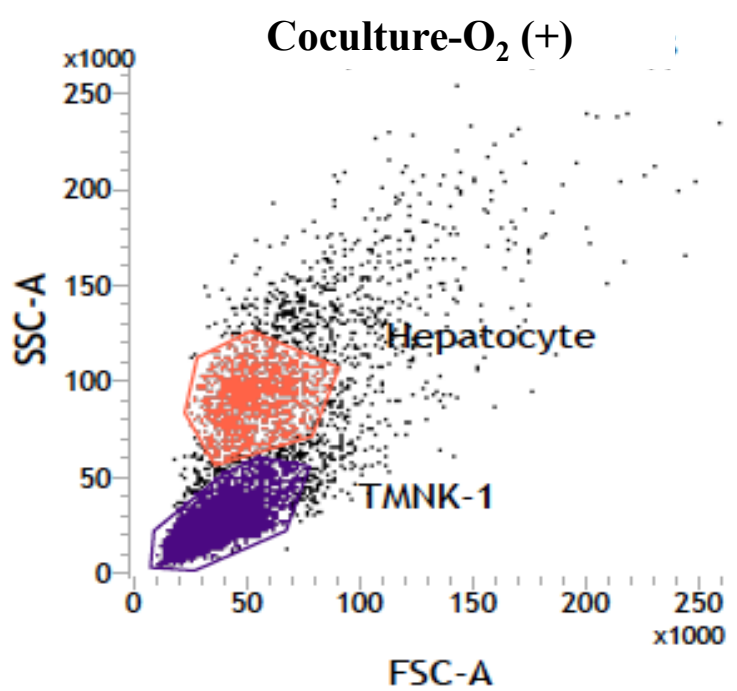

| Name       | Cells | % Parent |
|------------|-------|----------|
| Hepatocyte | 1395  | 15.3%    |
| TMNK-1     | 7681  | 84.7%    |

**Fig. S1 (run 1)**
