# Supplementary material for: New physiologically-relevant liver tissue model based on hierarchically cocultured primary rat hepatocytes with liver endothelial cells
Source: Royal Society of Chemistry journal article supplement (doi:10.1039/c5ib00170f), 2015-01-01
Supplement: c5ib00170f2.pdf [file c5ib00170f2.pdf]

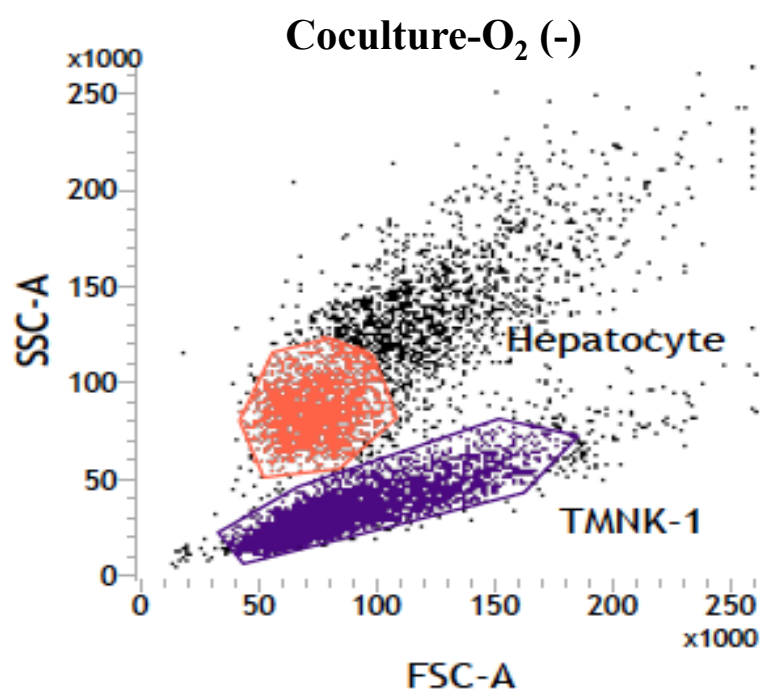

| Name       | Cells | % Parent |
|------------|-------|----------|
| Hepatocyte | 1906  | 23.0%    |
| TMNK-1     | 6380  | 77.0%    |

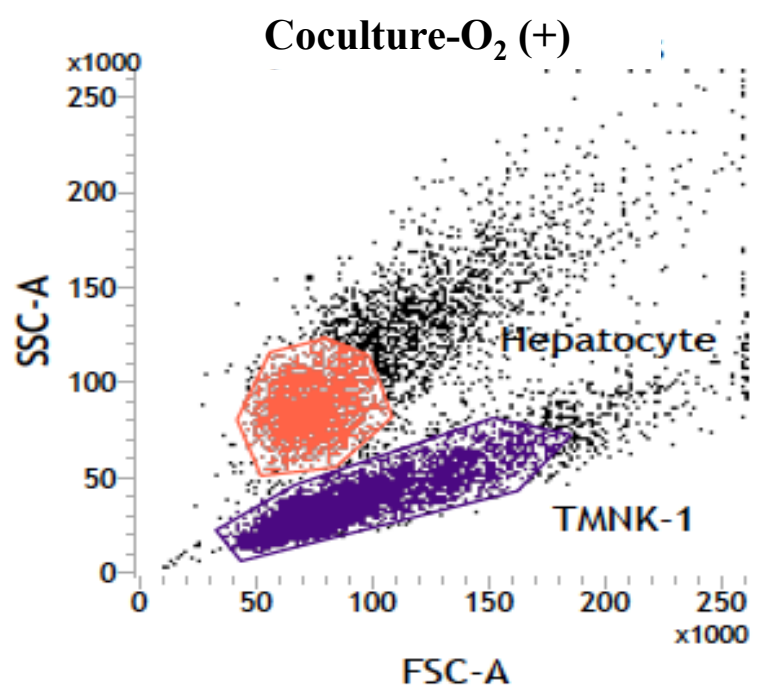

| Name       | Cells | % Parent |
|------------|-------|----------|
| Hepatocyte | 2,315 | 29.0%    |
| TMNK-1     | 5670  | 71.0%    |

**B**

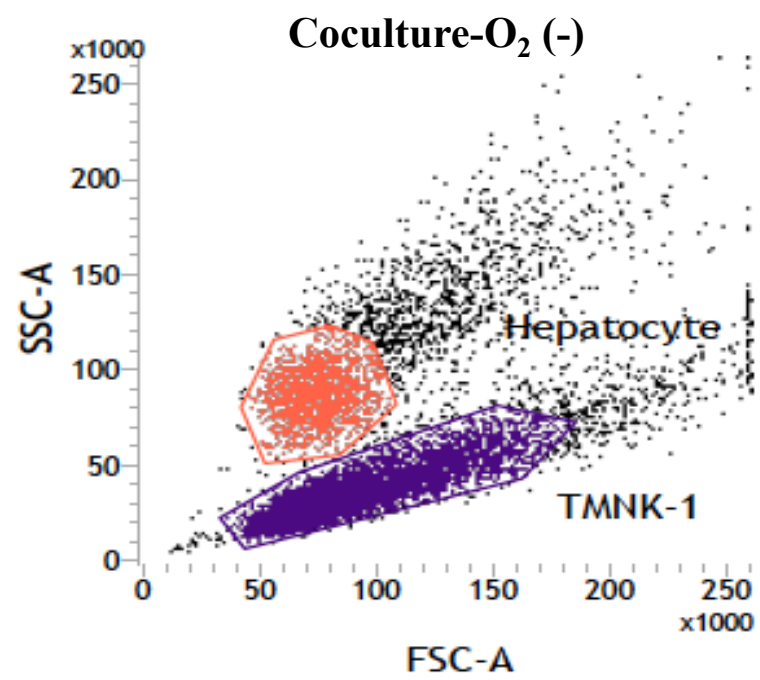

| Name       | Cells | % Parent |
|------------|-------|----------|
| Hepatocyte | 1358  | 16.2%    |
| TMNK-1     | 7007  | 83.8%    |

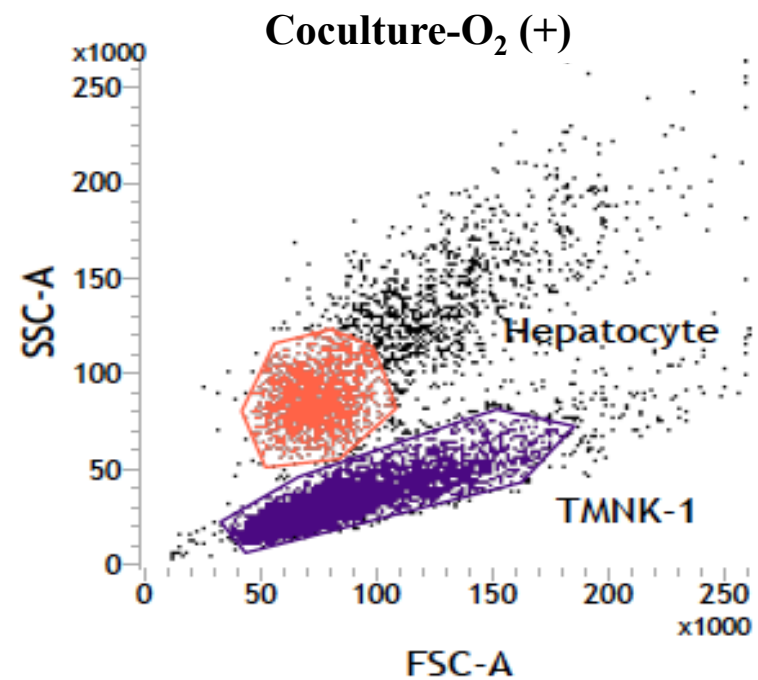

| Name       | Cells | % Parent |
|------------|-------|----------|
| Hepatocyte | 1658  | 19.1%    |
| TMNK-1     | 7026  | 80.9%    |

**C**

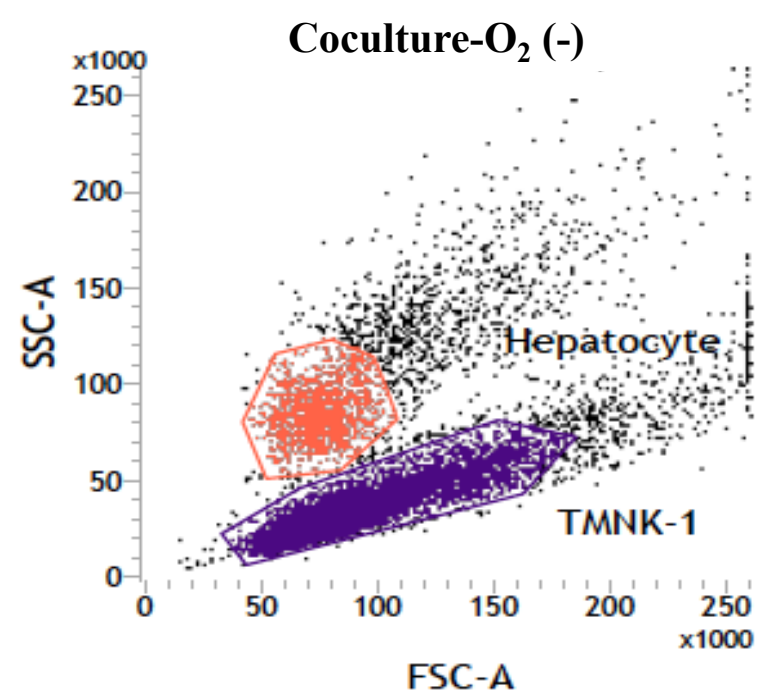

| Name       | Cells | % Parent |
|------------|-------|----------|
| Hepatocyte | 1387  | 16.5%    |
| TMNK-1     | 7022  | 83.5%    |

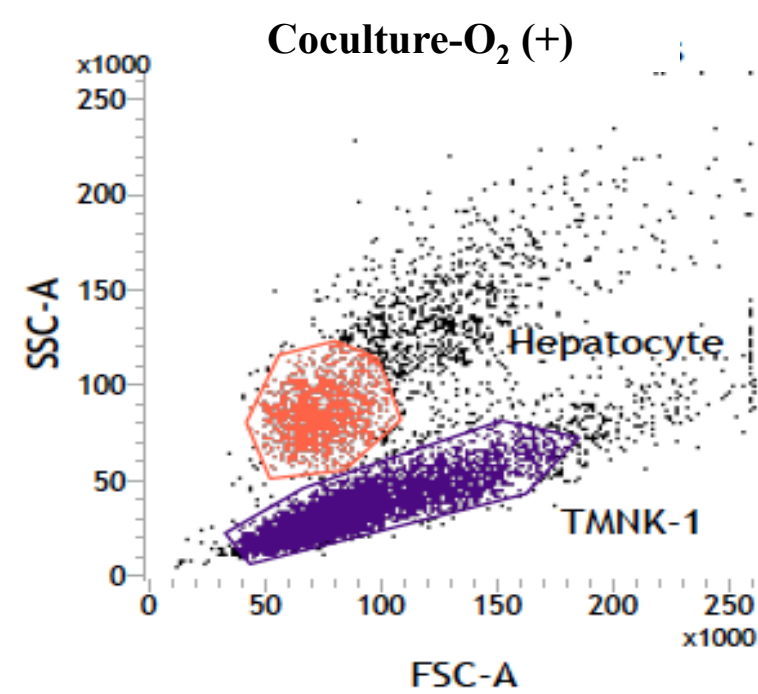

| Name       | Cells | % Parent |
|------------|-------|----------|
| Hepatocyte | 1469  | 16.9%    |
| TMNK-1     | 7223  | 83.1%    |

**Fig. S1 (run 2)**
